# Supplementary material
Source: publisher site journal article supplement (https://www.dovepress.com/article/450103)
Supplement: Supplementary file 1 [file get_supplementary_file.php]

**Supplemental Table 1. Low educational level as a risk factor for mortality among all subjects with respectively without asthma in Sweden and Norway. Results expressed as Hazard ratios (HR) with 95% CI from Cox regression models with 10-year mortality as outcome.**

|  |  | Sweden | |  | Norway | | Pooled* |  |
| --- | --- | --- | --- | --- | --- | --- | --- | --- |
|  |  | Without asthma | With asthma |  | Without asthma | With asthma | Without asthma | With asthma |
|  | Educational level | HR (95% CI) | HR (95% CI) |  | HR (95% CI) | HR (95% CI) | HR (95% CI) | HR (95% CI) |
|  |  |  |  |  |  |  |  |  |
| Crude | Primary | 3.90 (3.19-4.76) | 4.60 (2.42-8.75) |  | 2.45 (2.09-2.87) | 3.43 (2.19-5.39) | 2.93 (2.59-3.32) | 3.78 (2.62-5.45) |
|  | Upper secondary | 1.65 (1.37-1.99) | 1.92 (1.05-3.54) |  | 1.55 (1.34-1.80) | 1.79 (1.15-2.80) | 1.59 (1.41-1.78) | 1.84 (1.28-2.63) |
|  | Tertiary | 1 | 1 |  | 1 | 1 | 1 | 1 |
|  |  |  |  |  |  |  |  |  |
| Adjusteda | Primary | 1.92 (1.57-2.36) | 2.31 (1.20-4.46) |  | 1.64 (1.40-1.93) | 2.20 (1.40-3.46) | 1.74 (1.53-1.98) | 2.24 (1.54-3.25) |
|  | Upper secondary | 1.39 (1.15-1.80) | 1.72 (0.93-3.18) |  | 1.16 (0.99-1.34) | 1.36 (0.87-2.12) | 1.24 (1.10-1.39) | 1.47 (1.03-2.12) |
|  | Tertiary | 1 | 1 |  | 1 | 1 | 1 | 1 |
|  |  |  |  |  |  |  |  |  |
| Adjustedb | Primary | 1.74 (1.42-2.14) | 1.82 (0.93-3.56) |  | 1.40 (1.19-1.64) | 1.89 (1.20-1.97) | 1.52 (1.34-1.73) | 1.86 (1.28-2.71) |
|  | Upper secondary | 1.28 (1.06-1.55) | 1.55 (0.84-2.88) |  | 1.04 (0.89-1.21) | 1.26 (0.80-1.97) | 1.12 (0.99-1.26) | 1.35 (0.94-1.94) |
|  | Tertiary | 1 | 1 |  | 1 | 1 | 1 | 1 |
|  |  |  |  |  |  |  |  |  |

Adjusted models = adjusted for a) age and sex and b) age, sex, and smoking.

Swedish results also include cohort (OLIN/WSAS) as covariate in all models. Pooled* = pooled results from Sweden and Norway.

**Supplemental Table 2. Low educational level as a risk factor for mortality among non-smokers with and without asthma in Sweden and Norway. Results expressed as Hazard ratios (HR) with 95% CI from Cox regression models with 10-year mortality as outcome.**

|  |  | Sweden | |  | Norway | | Pooled* |  |
| --- | --- | --- | --- | --- | --- | --- | --- | --- |
|  |  | Without asthma | With asthma |  | Without asthma | With asthma | Without asthma | With asthma |
|  | Educational level | HR (95% CI) | HR (95% CI) |  | HR (95% CI) | HR (95% CI) | HR (95% CI) | HR (95% CI) |
|  |  |  |  |  |  |  |  |  |
| Crude | Primary | 4.47 (2.33-6.00) | 5.30 (2.11-13.29) |  | 1.70 (1.24-2.32) | 2.51 (0.95-6.59) | 2.85 (2.30-3.53) | 3.72 (1.91-7.23) |
|  | Upper secondary | 1.55 (1.17-2.05) | 1.68 (0.70-4.01) |  | 1.35 (1.05-1.73) | 0.62 (0.22-1.78) | 1.43 (1.19-1.73) | 1.12 (0.57-2.18) |
|  | Tertiary | 1 | 1 |  | 1 | 1 | 1 | 1 |
|  |  |  |  |  |  |  |  |  |
| Adjusteda | Primary | 1.95 (1.44-2.65) | 2.49 (0.95-6.53) |  | 1.07 (0.78-1.48) | 1.35 (0.50-3.62) | 1.47 (1.18-1.83) | 1.84 (0.93-3.68) |
|  | Upper secondary | 1.27 (0.96-1.68) | 1.39 (0.57-3.35) |  | 0.95 (0.73-1.22) | 0.41 (0.14-1.18) | 1.08 (0.89-1.30) | 0.84 (0.43-1.65) |
|  | Tertiary | 1 | 1 |  | 1 | 1 | 1 | 1 |
|  |  |  |  |  |  |  |  |  |

Adjusteda = adjusted for age and sex.

Swedish results also include cohort (OLIN/WSAS) as covariate in all models. Pooled* = pooled results from Sweden and Norway.

**Supplemental Table 3. Low educational level as a risk factor for mortality among ever-smokers with and without asthma in Sweden and Norway. Results expressed as Hazard ratios (HR) with 95% CI from Cox regression models with 10-year mortality as outcome.**

|  |  | Sweden | |  | Norway | | Pooled* |  |
| --- | --- | --- | --- | --- | --- | --- | --- | --- |
|  |  | Without asthma | With asthma |  | Without asthma | With asthma | Without asthma | With asthma |
|  | Educational level | HR (95% CI) | HR (95% CI) |  | HR (95% CI) | HR (95% CI) | HR (95% CI) | HR (95% CI) |
|  |  |  |  |  |  |  |  |  |
| Crude | Primary | 2.91 (2.20-3.84) | 3.61 (1.45-9.00) |  | 2.25 (1.86-2.74) | 3.13 (1.86-5.29) | 2.45 (2.09-2.87) | 3.24 (2.06-5.11) |
|  | Upper secondary | 1.49 (1.15-1.94) | 1.74 (0.72-4.20) |  | 1.44 (1.20-1.74) | 1.92 (1.14-3.22) | 1.46 (1.26-1.70) | 1.87 (1.20-2.93) |
|  | Tertiary | 1 | 1 |  | 1 | 1 | 1 | 1 |
|  |  |  |  |  |  |  |  |  |
| Adjusteda | Primary | 1.82 (1.37-2.42) | 2.35 (0.93-5.90) |  | 1.68 (1.38-2.04) | 2.28 (1.35-3.85) | 1.72 (1.47-2.02) | 2.29 (1.45-3.62) |
|  | Upper secondary | 1.42 (1.09-1.84) | 1.94 (0.80-4.69) |  | 1.18 (0.98-1.42) | 1.61 (0.96-2.70) | 1.25 (1.08-1.46) | 1.69 (1.08-2.64) |
|  | Tertiary | 1 | 1 |  | 1 | 1 | 1 | 1 |
|  |  |  |  |  |  |  |  |  |

Adjusteda = adjusted for age and sex.

Swedish results also include cohort (OLIN/WSAS) as covariate in all models. Pooled* = pooled results from Sweden and Norway.

**Supplement Table 4. Asthma as a risk factor for 10-year mortality, among all and stratified by educational levels. Results are expressed as Hazard ratios with 95% Confidence intervals, with additional adjusted for BMI, physical activity, and comorbidity in Norway.**

|  | Men | Women |  |  | All |
| --- | --- | --- | --- | --- | --- |
|  | Adjusteda | Adjusteda |  |  | Adjusteda |
| Educational level | HR (95% CI) | HR (95% CI) |  |  | HR (95% CI) |
|  |  |  |  |  |  |
| Primary | 1.95 (1.41-2.69) | 1.59 (1.13-2.25) |  |  | 1.79 (1.42-2.26) |
| Upper secondary | 1.42 (1.05-1.93) | 1.79 (1.30-2.45) |  |  | 1.57 (1.27 -1.95) |
| Tertiary | 1.62 (0.95-2.75) | 0.96 (0.46-1.99) |  |  | 1.32 (0.86 -2.03) |
|  |  |  |  |  |  |
| Total | 1.65 (1.35-2.02) | 1.59 (1.28-1.98) |  |  | 1.63 (1.40 -1.89) |
|  |  |  |  |  |  |

Adjusteda = Cox regression models with age, sex, smoking, BMI, physical activity, and comorbidity (cardiovascular disease, blood pressure medication, diabetes, anxiety, and depression) as covariates.

**Supplement Table 5. Asthma as a risk factor for 10-year mortality, among all and stratified by educational levels. Results are expressed as age- and sex-adjusted Hazard ratios with 95% Confidence intervals.**

|  | Sweden | | |  | Norway | | |  | Pooled* | Pooled* | Pooled* |
| --- | --- | --- | --- | --- | --- | --- | --- | --- | --- | --- | --- |
|  | Adjusteda  All | Adjustedb  Men | Adjustedb  Women |  | Adjusteda  All | Adjustedb  Men | Adjustedb  Women |  | Adjusteda  All | Adjustedb  Men | Adjustedb  Women |
| Educational level | HR (95% CI) | HR (95% CI) | HR (95% CI) |  | HR (95% CI) | HR (95% CI) | HR (95% CI) |  | HR (95% CI) | HR (95% CI) | HR (95% CI) |
|  |  |  |  |  |  |  |  |  |  |  |  |
| Primary | 1.53 (1.07-2.20) | 1.65 (1.00-2.73) | 1.40 (0.83-2.37) |  | 2.02 (1.61-2.53) | 2.14 (1.57-2.93) | 1.90 (1.36-2.64) |  | 1.87 (1.54-2.27) | 1.99 (1.53-2.60) | 1.74 (1.32-2.30) |
| Upper secondary | 1.68 (1.26-2.24) | 1.01 (0.62-1.63) | 2.57 (1.78-3.72) |  | 1.77 (1.43-2.20) | 1.53 (1.13-2.06) | 2.11 (1.56-2.87) |  | 1.74 (1.47-2.07) | 1.36 (1.05-1.75) | 2.29 (1.81-2.90) |
| Tertiary | *1.37 (0.77-2.41)* | 1.53 (0.66-3.51) | 1.26 (0.58-2.76) |  | 1.53 (1.01-2.33) | 2.01 (1.20-3.37) | 1.03 (0.50-2.12) |  | 1.47 (1.05-2.06) | 1.86 (1.20-2.89) | 1.13 (0.67-1.92) |
|  |  |  |  |  |  |  |  |  |  |  |  |
| Total | 1.59 (1.29-1.96) | 1.28 (0.93-1.76) | 1.93 (1.46-2.55) |  | 1.89 (1.63-2.18) | 1.86 (1.52-2.27) | 1.92 (1.55-2.38) |  | 1.78 (1.59-2.01) | 1.67 (1.41-1.98) | 1.92 (1.62-2.28) |
|  |  |  |  |  |  |  |  |  |  |  |  |

Adjusteda = adjusted for age and sex. Adjustedb = adjusted for age. Swedish results also include cohort (OLIN/WSAS) as covariate in all models. Pooled* = pooled results from Sweden and Norway. HR=Hazard ratio. CI=Confidence interval. *Italic font* indicates p<0.05 for Schoenfeld's global test to test the proportional hazards assumption in the Cox proportional hazards model.
